# Supplementary material for: Long-acting beta-agonists plus inhaled corticosteroids safety: a systematic review and meta-analysis of non-randomized studies
Source: PubMed Central journal article supplement (PMC4132190; doi:10.1186/1465-9921-15-83), 2014-07-19
Supplement: 1465-9921-15-83-S1.pdf [file 1465-9921-15-83-S1.pdf]

## **Online Supplementary Material**

### **LABAs plus Inhaled Corticosteroids safety: a systematic review of non-randomized studies**

Hernández G, Avila M, Pont A, O.Garin, Laforest L, Cates C, Alonso J, Ferrer M, and the ASTROLAB group.

#### **eMethods**

- I. Search Strategy

#### **eTables**

- I. Study Inclusion and Exclusion criteria
- II. Quality assessment of each article
- III. Reasons for exclusion in each step of the Systematic Review
- IV. Characteristics of excluded studies

**eMethods1 . Search Strategy**

**MEDLINE**

((asthma[MeSH Terms]) OR asthma\*[Text Word]) AND (((adrenergic beta 2 agonists[MeSH Terms]) OR long acting\*[Text Word]) OR long-acting\*[Text Word]) OR LABA\*[Text Word]) OR salmeterol[Text Word] OR formoterol[Text Word] ) NOT clinical trials, randomized[MeSH Terms].

**EMBASE**

('asthma'/exp OR asthma AND [humans]/lim AND [2000-2012]/py) AND ('beta 2 adrenergic receptor stimulating agent'/exp OR 'formoterol'/exp OR 'salmeterol'/exp OR (laba AND [2000-2012]/py))

**eTable I. Study Inclusion and Exclusion Criteria**

| <b>PICO criteria</b>                        | <b>Inclusion and exclusion criteria</b>                                                                                                                                                                                                                                                                                                                                                                              |
|---------------------------------------------|----------------------------------------------------------------------------------------------------------------------------------------------------------------------------------------------------------------------------------------------------------------------------------------------------------------------------------------------------------------------------------------------------------------------|
| <b>Population and condition of interest</b> | <p>Study design included in one of these: non-randomized controlled trials, controlled before-after studies; prospective cohort studies, retrospective cohort studies, historically controlled trials, case-control studies and nested case-control studies.</p> <p>Studies that enrolled patients with asthma diagnosed.</p> <p>Studies included adults, children and mixed age population (adult and children)</p> |
| <b>Interventions</b>                        | All studies included LABAs combined with ICs (single or separate inhalers)                                                                                                                                                                                                                                                                                                                                           |
| <b>Comparator</b>                           | ICs alone (co-medication was admitted such as SABA, immunomodulators)                                                                                                                                                                                                                                                                                                                                                |
| <b>Outcomes</b>                             | We included studies that reported the following outcomes: severe exacerbation (use of systemic corticosteroids, asthma-related emergency room visits, hospitalizations, intubations, or intensive care unit admissions), moderate exacerbation (use of SABA) , adverse events, death                                                                                                                                 |

**eTablell: Risk of bias assessment Cochrane´s Checklist****Item**

**Was there a comparison between 2 or more groups of participants receiving different interventions?**

**Were participants allocated to groups:**

- by treatment decisions?
- by participant's preferences?
- on the basis of outcome?

**Which part of the study was prospective?**

- Identification of participants\*
- Assessment of baseline and allocation to intervention?\*
- Assessment of outcomes?
- Assessment of hypothesis?

**On what variables was comparability between groups assessed?**

- Potential confounders?
- Baseline assessment of outcome variables?

---

***\*only for Prospective Studies***

**Options: YES / No / Possibly**

**eTable III: Reasons for exclusion in each step of the Systematic Review**

| <b>MEDLINE</b>                                      | <b>Review of titles</b> | <b>Review of abstracts</b> | <b>Review of manuscripts</b> |
|-----------------------------------------------------|-------------------------|----------------------------|------------------------------|
| <b>1. Inclusion (eligible for next review step)</b> |                         |                            |                              |
| <b>2. Study design</b>                              |                         |                            |                              |
| 2a. Randomized clinical trial                       | 116 (8.1%)              | 429 (34.4%)                | 22 (14.2%)                   |
| 2b. Ecological                                      | 1 (0.1%)                | 2 (0.2%)                   | 1 (0.6%)                     |
| 2c. Health economic evaluations                     | 37 (2.6%)               | 20 (1.6%)                  | 1 (0.6%)                     |
| 2d. Systematic Review / Meta-analysis               | 51 (3.6%)               | 30 (2.4%)                  |                              |
| 2e. Pooled                                          |                         | 2 (0.2%)                   | 2 (1.3%)                     |
| 2x. Others                                          | 7 (0.5%)                | 27 (2.2%)                  | 31 (20%)                     |
| <b>3. Population</b>                                |                         |                            |                              |
| 3a. COPD                                            | 79 (5.5%)               | 4 (0.3%)                   | 1 (0.6%)                     |
| 3X. Others                                          | 52 (3.6%)               | 15 (1.2%)                  | 3 (0.6%)                     |
| <b>4. Treatment</b>                                 |                         |                            |                              |
| 4a. SABAs                                           | 20 (1.4%)               | 3 (0.2%)                   | 3 (1.9%)                     |
| 4b. Omalizumab / Lebrikizumab                       | 34 (2.4%)               | 3 (0.2%)                   | 1 (0.6%)                     |
| 4c. Antileukotriens: Montelukast/Pranlukast         | 51 (3.6%)               | 2 (0.2%)                   | 5 (3.2%)                     |
| 4d. Bronchial thermoplasty                          |                         | 2 (0.2%)                   |                              |
| 4X. Others                                          | 91 (6.4%)               | 14 (1.1%)                  | 46 (29.7%)                   |
| <b>5. Administration Form</b>                       |                         |                            |                              |
| 5a. Oral                                            | 7 (0.5%)                | 1 (0.1%)                   |                              |
| 5X. Others                                          | 4 (0.3%)                |                            |                              |
| <b>6. Publication type</b>                          |                         |                            |                              |
| 6a. Reviews                                         | 238 (16.6%)             | 546 (43.7%)                | 2 (1.3%)                     |

|                                    |             |             |            |
|------------------------------------|-------------|-------------|------------|
| 6b. Case series / case report      | 22 (1.5%)   | 8 (0.6%)    | 2 (1.3%)   |
| 6c. Letter to the editor           | 22 (1.5%)   | 1 (0.1%)    |            |
| 6d. Comments                       | 71 (5.0%)   | 18 (1.4%)   |            |
| 6e. Guidelines                     | 29 (2.0%)   | 1 (0.1%)    |            |
| 6X. Others                         | 8 (0.6%)    | 4 (0.3%)    |            |
| <b>7. Outcome</b>                  |             |             |            |
| 7c. HRQL and other PRO             | 14 (1.0%)   | 14 (1.1%)   | 2 (1.3%)   |
| 7X. Others                         | 50 (3.5%)   | 50 (4.0%)   | 29 (18.7%) |
| <b>8. Others</b>                   |             |             |            |
| 8a. Pathophysiology and medication | 257 (18.0%) | 18 (1.4%)   | 3 (1.9%)   |
| 8b. No thumans                     | 11 (0.8%)   | 2 (0.2%)    | 3 (1.9%)   |
| 8c. Genetics                       | 71 (5.0%)   | 1 (0.1%)    |            |
| 8d. Diagnostic                     | 59 (4.1%)   |             |            |
| 8X. Others                         | 28 (2.0%)   | 29 (2.3%)   |            |
| <b>TOTAL</b>                       | <b>1430</b> | <b>1246</b> | <b>155</b> |

---

| <b>EMBASE</b>                                       | <b>Review of titles</b> | <b>Review of abstracts</b> | <b>Review of manuscripts</b> |
|-----------------------------------------------------|-------------------------|----------------------------|------------------------------|
| <b>1. Inclusion (eligible for next review step)</b> |                         |                            |                              |
| <b>2. Study design</b>                              |                         |                            |                              |
| 2a. Randomized clinical trial                       | 12 (1.2%)               | 10 (3.4%)                  |                              |
| 2b. Ecological                                      |                         | 2 (0.7%)                   |                              |
| 2c. Health economic evaluations                     | 14 (1.4%)               | 11 (3.7%)                  |                              |
| 2d. Systematic Review / Meta-analysis               | 10 (0.1%)               | 3 (1%)                     |                              |
| 2e. Pooled                                          |                         |                            |                              |
| 2x. Others                                          | 1 (0.01%)               | 18 (6.1%)                  | 1 (3.3%)                     |
| <b>3. Population</b>                                |                         |                            |                              |
| 3a. COPD                                            | 50 (4.8%)               | 3 (1%)                     |                              |
| 3b. Rhinitis                                        | 6 (0.6%)                |                            |                              |
| 3c. Allergy                                         | 15 (1.5%)               | 1 (0.3%)                   |                              |
| 3X. Others                                          | 188 (18.2%)             | 1 (0.3%)                   |                              |
| <b>4. Treatment</b>                                 |                         |                            |                              |
| 4a. SABAs                                           | 9 (0.9%)                | 5 (1.7%)                   |                              |
| 4b. Omalizumab / Lebrikizumab                       | 44 (4.3%)               | 4 (1.4%)                   | 1 (3.3%)                     |
| 4c. Antileukotriens: Montelukast / Pranlukast       | 55 (5.3%)               | 4 (1.4%)                   |                              |
| 4d. Bronchial thermoplasty                          | 5 (0.5%)                |                            |                              |
| 4e. Anticholinergics                                | 1 (0.1%)                |                            |                              |
| 4X. Others                                          | 102 (9.9%)              | 31 (10.5%)                 | 2 (6.7%)                     |
| <b>5. Administration Form</b>                       |                         |                            |                              |
| 5a. Oral                                            | 1 (0.1%)                |                            |                              |
| 5b. IV                                              | 1 (0.1%)                |                            |                              |

|                                    |             |             |            |
|------------------------------------|-------------|-------------|------------|
| 5X. Others                         | 5 (0.5%)    |             |            |
| <b>6. Publication type</b>         |             |             |            |
| 6a. Reviews                        | 33 (3.2%)   | 56 (19%)    |            |
| 6b. Case series / case report      | 135 (13.1%) | 12 (4.1%)   |            |
| 6c. Letter to the editor           | 6 (0.6%)    |             |            |
| 6d. Comments                       | 19 (1.8%)   | 1 (0.3%)    |            |
| 6e. Guidelines                     | 18 (1.7%)   |             |            |
| 6X. Others                         | 8 (0.8%)    |             | 13 (43.3%) |
| <b>7. Outcome</b>                  |             |             |            |
| 7a. Congenital malformation        | 8 (0.8%)    |             |            |
| 7c. HRQL and other PRO             | 17 (1.6%)   | 4 (1.4%)    |            |
| 7X. Others                         | 73 (7.1%)   | 109 (37.1%) | 5 (16.7%)  |
| <b>8. Others</b>                   |             |             |            |
| 8a. Pathophysiology and medication | 31 (3%)     | 2 (0.7%)    |            |
| 8b. Not humans                     | 1 (0.1%)    |             |            |
| 8c. Genetics                       | 65 (6.3%)   | 2 (0.7%)    |            |
| 8d. Diagnostic                     | 40 (3.9%)   |             |            |
| 8X. Others                         | 58 (5.6%)   | 15 (5.1%)   | 2 (6.7%)   |
| <b>9. Repeated</b>                 |             |             | 6 (20%)    |
| <b>TOTAL</b>                       | 1031        | 294         | 30         |

---



**eTableIV: Characteristics of excluded studies**

| Author                | Study characteristics |                |             | Type of inhaler | Reason for exclusion                                                     | Outcomes                                                                          |
|-----------------------|-----------------------|----------------|-------------|-----------------|--------------------------------------------------------------------------|-----------------------------------------------------------------------------------|
|                       | Study type            | Population (N) | Age (Range) |                 |                                                                          |                                                                                   |
| Elkout et al.2012     | RC                    | 3172           | 0-18        | Sin & Sep       | Other outcome                                                            | Number of SABA and courses of SysCort prescribed annually.                        |
| Navaratnam et al.2011 | RC                    | 16063          | 12-65       | Single          | No LABA in intervention group                                            | Asthma control outcomes                                                           |
| Butland et al. 2011   | C-C                   | 1064           | 1-64        | Not stated      | Exposure not divided in adequate groups                                  | Asthma deaths                                                                     |
| Liao et al.2010       | PC                    | 2236           | 12-54       | Not stated      | Other outcome                                                            | Risk of admission among ED patients with Acute Asthma                             |
| Elkout et al. 2010    | RC                    | 10454          | 0-18        | Sin & Sep       | Comparison IC/LABA vs IC+LABA                                            | Number of SABA prescription, prescription of systemic corticosteroid use          |
| Zhang et al.2009      | RC                    | 507966         | > 18        | Not stated      | Other outcome                                                            | Acute myocardial infarction                                                       |
| Smith et al. 2009     | RC                    | 3013           | 5-62        | Sin & Sep       | Outcome not related to medication                                        | Exacerbation requiring hospital visit                                             |
| Plaza et al.2009      | RC                    | 1153           | 15-69       | Not stated      | Descriptive analysis of clinical characteristics of asthma exacerbations | Clinical characteristics: mortality, length of stay, gas exchange, lung function. |
| Navaratnam et al.2009 | RC                    | 8188           | 12-65       | Single          | No endpoint measure                                                      | Mean of exacerbations                                                             |
| Spahn et al.2009      | RC                    | 46774          | 4-55        | Single          | Comparison group not stated                                              | Asthma-related ED visits and hospitalization                                      |

|                      |     |      |       |            |                                                   |                                                                                                    |
|----------------------|-----|------|-------|------------|---------------------------------------------------|----------------------------------------------------------------------------------------------------|
| Wang et al.2008      | C-C | 1940 | > 5   | Not stated | Exposure not divided in adequate groups           | Asthma-related hospitalization                                                                     |
| Borderias et al.2007 | RC  | 696  | 15-55 | Not stated | Addition of Montelukast to IC plus LABA treatment | Asthma attacks, use of SABAs                                                                       |
| Lyell et al.2005     | CC  | 105  | <16   | Not stated | Exposure not divided in adequate groups           | Factors that may predict severe asthma attacks                                                     |
| Laforest et al.2005  | RC  | 1038 | 17-50 | Not stated | Other outcome                                     | Antibiotic prescription                                                                            |
| Angus et al. 2005    | RC  | 588  | 4-55  | Sin & Sep  | Comparison IC/LABA vs IC+LABA                     | SABA use, Oral corticosteroids use                                                                 |
| Anderson et al. 2005 | C-C | 1064 | < 65  | Not stated | Exposure not divided in adequate groups           | Asthma deaths                                                                                      |
| Chan et al. 2004     | RC  | 2246 | 12-55 | Sin & Sep  | Comparison IC/LABA vs IC+LABA                     | Asthma-related ED visits, asthma-related hospitalization, use of SABA, systemic corticosteroid use |

---

**RC:** Retrospective Cohort; **C-C:** case-control study; **PC:** Prospective cohort; **BS:** Before-after study; **Sing & Sep:** Single and separate inhalers; **HR=** Hazard Ratio; **OR=**Odds Ratio; **a=**adjusted; **u=**unadjusted; ED = Emergency Room; **PS=** Propensity Score

---
